# Supplementary material for: Caspase 9b Drives Cellular Transformation, Lung Inflammation, and Lung Tumorigenesis
Source: PubMed Central journal article supplement — Mol Cancer Res. 2022 Apr 12;20(8):1284–94. doi: 10.1158/1541-7786.MCR-21-0905 (PMC9356980; doi:10.1158/1541-7786.mcr-21-0905), 2022-04-12
Supplement: NIHMS1799580-supplement-1.pdf [file NIHMS1799580-supplement-1.pdf]

## SUPPLEMENTARY INFORMATION

### Caspase-9b drives cellular transformation, lung inflammation, and lung tumorigenesis.

Minjung Kim<sup>1\*</sup>, Ngoc T. Vu<sup>1</sup>, Xue Wang<sup>1</sup>, Gamze B. Bulut<sup>2</sup>, Min-Hsuan Wang<sup>3</sup>, Cora Uram-Tuculescu<sup>4</sup>, Raghavendra Pillappa<sup>4</sup>, Sungjune Kim<sup>3</sup>, Charles E. Chalfant<sup>1,5,6,\*,#</sup>

## SUPPLEMENTARY MATERIALS AND METHODS

**Viral production:** All plasmid vectors were generated with standard gateway cloning methods (1). PCR fragments of Myc-tagged wild-type (WT) and AT/GG mutant of C9b (Mut) CDS (2) flanked with attB1 and attB2 were cloned into pDONR223 (Invitrogen) using BP clonase (Invitrogen) to generate pEntry clones. To generate lentiviral expression plasmids, these inserts in pEntry clones were mobilized into pLEX304 (addgene #25890, blasticidin) via LR clonase (Invitrogen). As a control, eGFP (addgene #5301) is cloned into pLEX304. In addition, 3-way LR clonase gateway reaction (1) is performed by mixing pBEG R2-iCre T2A Luciferase-L3 (addgene #48992) and pLEG R1-R3 (addgene #48956) with pEntry-eGFP, -WT, or - AT/GG Mut C9b to allow polycistronic expression(3) of eGFP, WT, or Mut C9b with Cre. To produce virus, 293T cells are transfected with expression viral vectors together with psPAX2 (addgene #12260) and pMD2.G (addgene #12259) using Polyethylenimine (PEI, Sigma). The supernatant of the 293T cells was harvested at 48 and 72hr post-transfection and passed through a 0.45 µm filter before concentration by centrifugation as described (4). Viral titer is determined using p24 ELISA kit (Takara) according to the manufacturer's instruction.

**Quantitative RT-PCR (RT-qPCR):** All RT-qPCRs were performed as previously described (2,5). The relative mRNA expression of human *IL-6* (forward (f): 5'-ACTCACCTCTTCAGAACGAATTG-3', reverse (r): 5'-CCATCTTTGGAAGGTTTCAGGTTG-3', annealing temperature at 54 degree)

and human *CXCL1* (f: 5'-AGTGGCACTGCTGCTCCT-3', r: 5'-TGGATGTTCTTGGGGTGAAT-3', annealing temperature at 56 degree) was normalized to  $\beta$ -Actin. Mouse *Cxcl1* (f: 5'-ACTGCACCCAAACCGAAGTC-3', r: 5'- TGGGGACACCTTTTAGCATCTT-3') and *Cxcl2* (f: 5'-GAGCTTGAGTGTGACGCCCCCAGG-3', r: 5'- GTTAGCCTTGCCTTTGTTTCAGTATC-3') was normalized to R15 (f: 5'-CTTCCGCAAGTTCACCTACC-3', r: 5'- TACTTGAGGGGGATGAATCG-3').

**Mouse Cytokine array:** The levels of cytokines, chemokines, and acute-phase proteins in the plasma were measured with Proteome Profiler Mouse Cytokine Array Kit Panel A from R&D systems according to the manufacturer's protocol using plasma samples pooled from 4 mice (at 1:1:1:1 ratio) in each group (control and C9b). The array data were quantitated using ImageJ (NIH), normalized to the reference spot on the same blot to determine the ratio (C9b to control).

**IL-6 enzyme-linked immunosorbent assays (ELISA):** The levels of IL-6 in the plasma were determined with an IL-6 mouse ELISA kit (ThermoFisher) following the manufacturer's instruction. using 100  $\mu$ l of plasma (diluted in sample diluent at 1:1) or standard was added into the wells pre-coated with anti-mouse IL-6 antibody.

## SUPPLEMENTARY FIGURES AND FIGURE LEGENDS

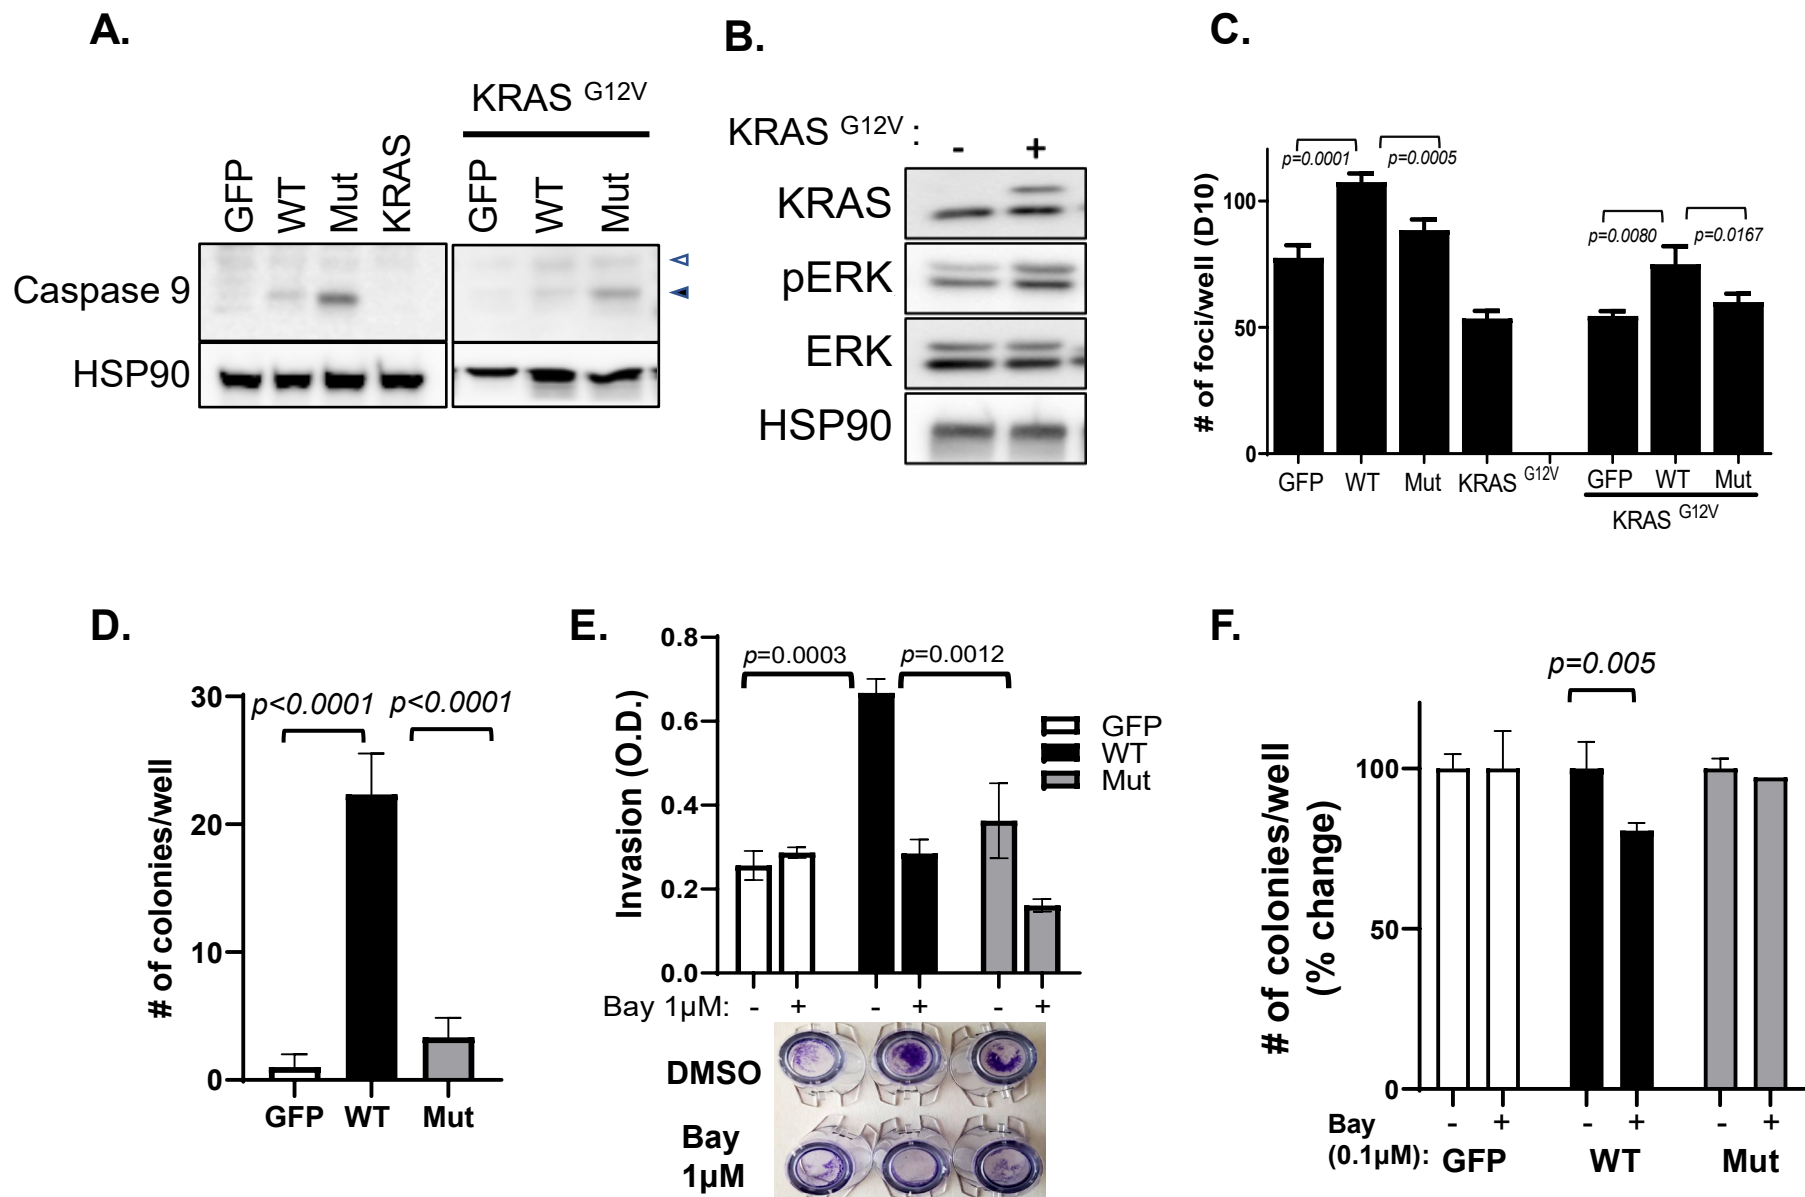

Suppl Fig. S1.

**Supplementary Figure S1. A&B.** Western blot analyses of MLE12 and MLE12-K (with *KRAS*<sup>G12V</sup>) cells expressing GFP, wild type (WT), or AT/GG mutant (Mut) C9b with indicated antibodies. *KRAS*<sup>G12V</sup> expression increased pERK (**B**). The empty and filled triangles denote full-length C9a and C9b proteins, respectively. **C.** Clonogenic assays. The Graph shows the number of clonal foci per well on D10. **D.** Number of colonies of MLE12-K cells per well grown in soft agar on D75. **E.** Absorbance (O.D.at 570nm) of crystal violet dye extracted from MLE12-K cells expressing GFP, WT, or Mut C9b invaded through Matrigel at 22hr per well (seeded in triplicates). Cells were treated with DMSO or Bay 11-7082 (1  $\mu$ m). **F.** Normalized number of clonal foci in clonogenic assays. Cells were treated with DMSO or Bay 11-7082 0.1  $\mu$ M for 48 hrs followed by growth in complete media for 10 days. WT C9b expression sensitized cells to NF- $\kappa$ B inhibition. Data in the graph are means  $\pm$  SD; n = 3 each. Adjusted *p* values are determined by ANOVA Tukey's multiple comparison test.

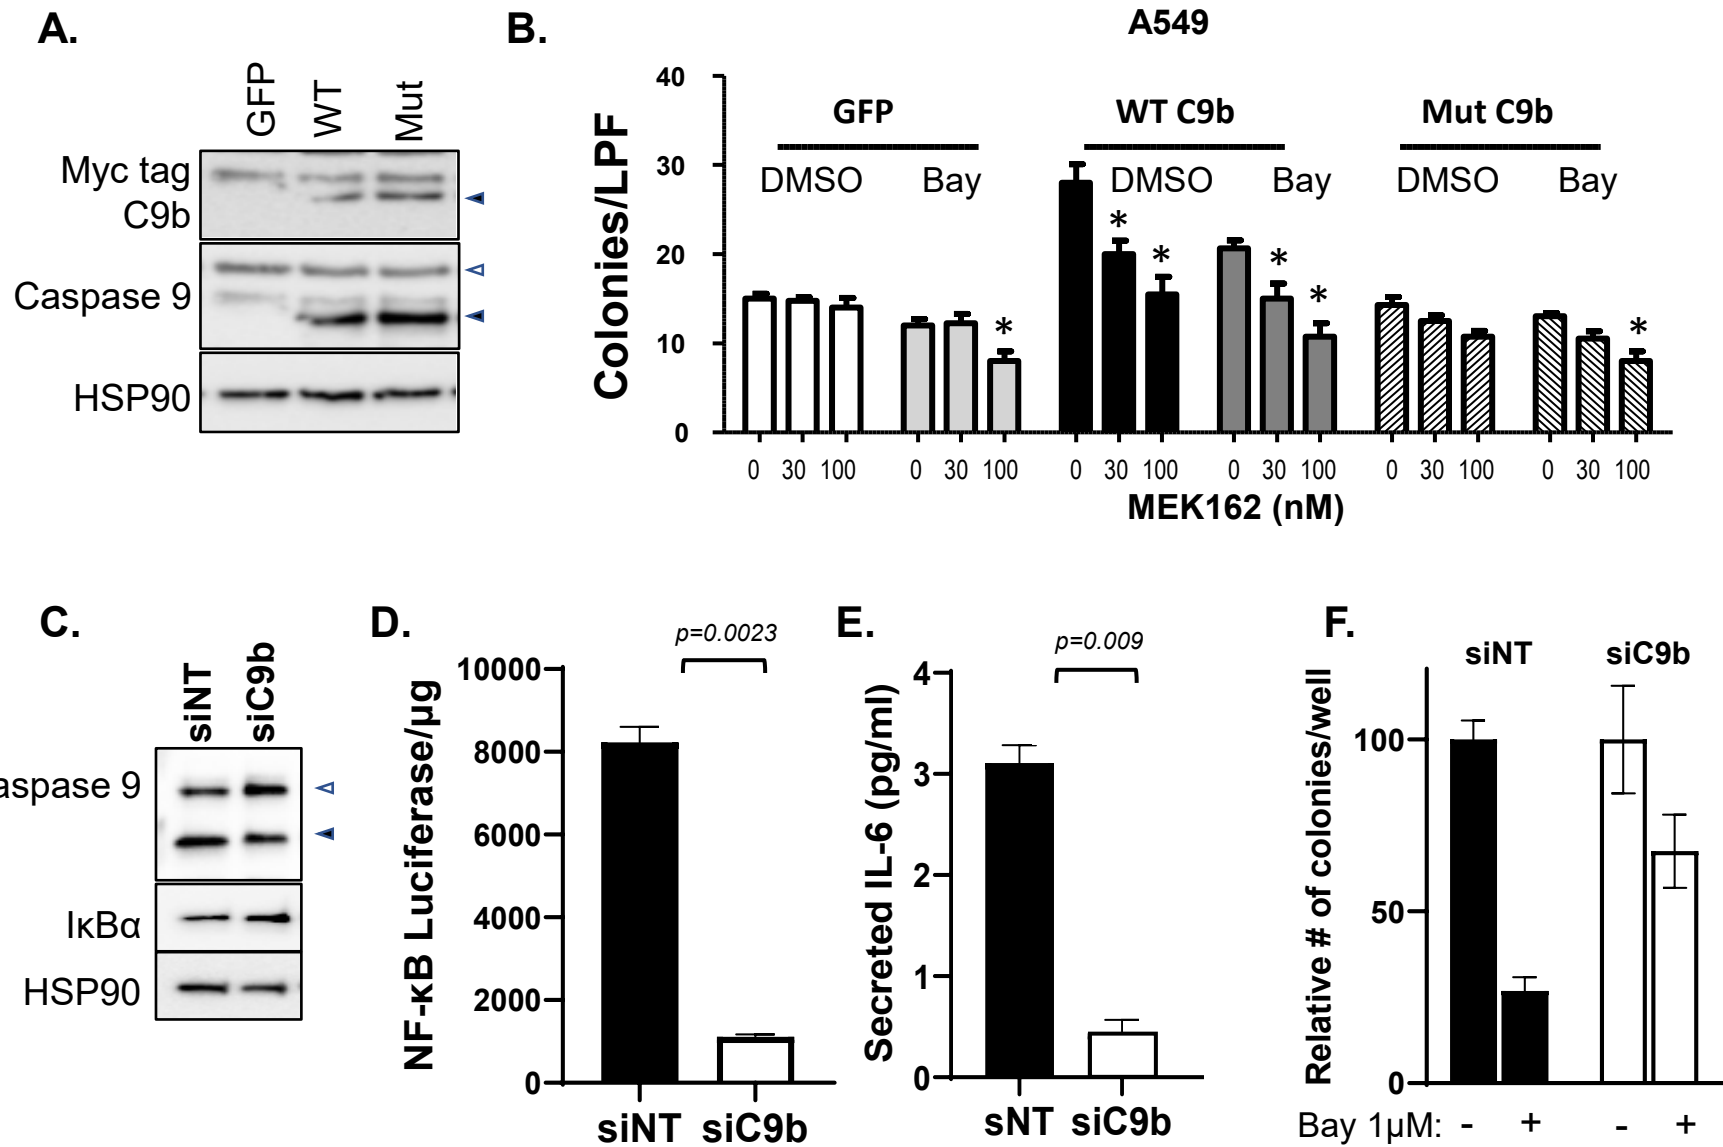

**G.**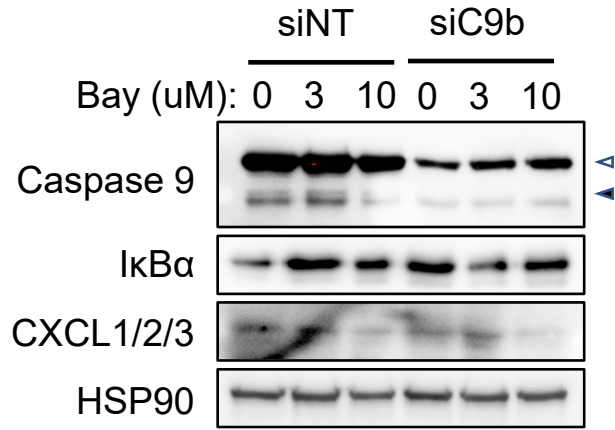**H.**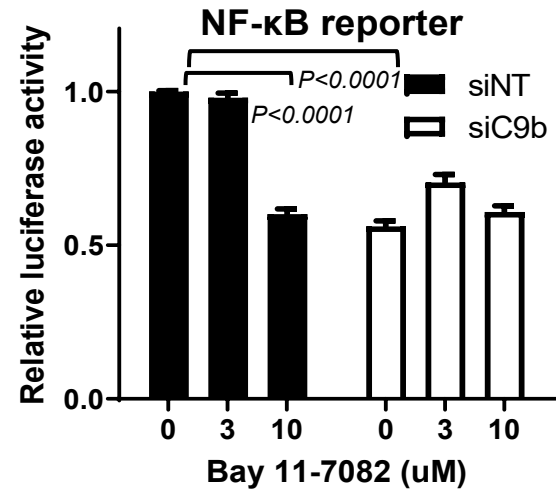**I.**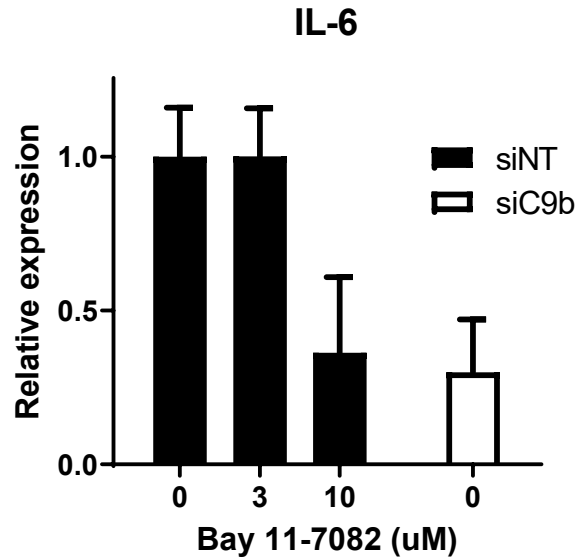**J.**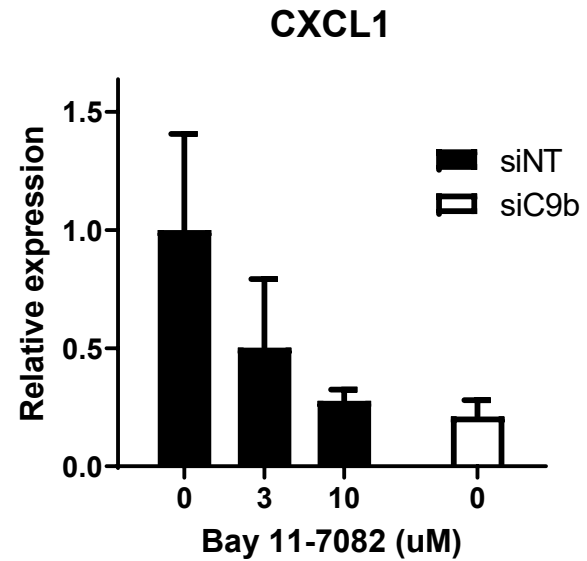

**Supplementary Figure S2. C9b activates NF- $\kappa$ B pathway and cooperates with RAS/MEK/ERK pathway in A549 (*KRAS*<sup>G12C</sup> mutant) cells. A-B.** WT or Mut C9b expression in A549 cells was confirmed by immunoblotting with anti-Myc tag and Caspase 9 (C9) antibody (**A**). HSP90 serves as a loading control. **B.** Number of colonies per LPF view grown in soft agar on day 21 of A549 cells with GFP, WT or Mut C9b expression (mean +/-SD). Cells were continuously treated with DMSO, Bay 11-7082 (IKK inhibitor, 10uM), and/or MEK162 (MEK inhibitor, 30 and 100 nM). Media were changed twice a week. Bay 11-7082 suppressed soft agar colony growth of A549 cells with WT C9b expression, which were further suppressed by the combined treatment of Bay11-7082 with MEK162. Treatments that caused statistically significant changes compared to DMSO control are marked with \* ( $p < 0.05$ ). **C-F.** siRNA mediated knock-down of C9b expression (siC9b) in A549 cells (transduced with luciferase reporter driven by minimal Thymidine kinase promoter with 4 consecutive NF- $\kappa$ B consensus sequences (Addgene # 49343)). Reduced C9b expression suppressed NF- $\kappa$ B-driven luciferase activity (**D**) and decreased secreted IL-6 (one of the NF- $\kappa$ B downstream targets) in conditioned media (**E**, IL-6 Proquantum assay, ThermoFisher) and increased I $\kappa$ B $\alpha$  (**C**). **F.** Normalized number of clonal foci per well of A549 cells with siNT or siC9b in clonogenic assays. Cells were treated with DMSO or Bay 11-7082 1  $\mu$ M for 24 hrs followed by growth in 10% serum containing media for 10 days. C9b knock-down desensitized cells to NF- $\kappa$ B inhibition. **G-J.** Bay 11-7082 treatment (18hr in serum free media) of A549 cells with siNT suppressed NF- $\kappa$ B-driven luciferase activity (**G**) and mRNA expression of IL-6 (**I**) and CXCL1 (**G** and **J**), NF- $\kappa$ B downstream targets to the level comparable to those observed in A549 with siC9b. Data are means  $\pm$  SD; n = 3 each. Adjusted  $p$  values are determined by ANOVA Tukey's multiple comparison test. The empty and filled triangles denote full-length C9a and C9b proteins, respectively.



**WT**

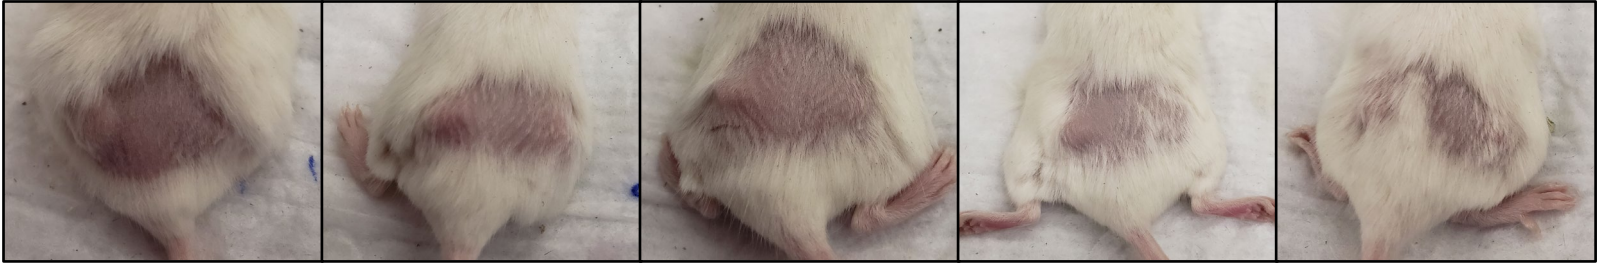

**Mut**

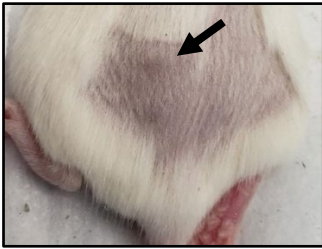

on D30 post-implantation

**Suppl Fig. S3.**

**Supplementary Figure S3.** Images of subcutaneous tumors on SCID mice implanted with HBEC-3KT/KP cells with WT or Mut C9b on day 30 post implantation.

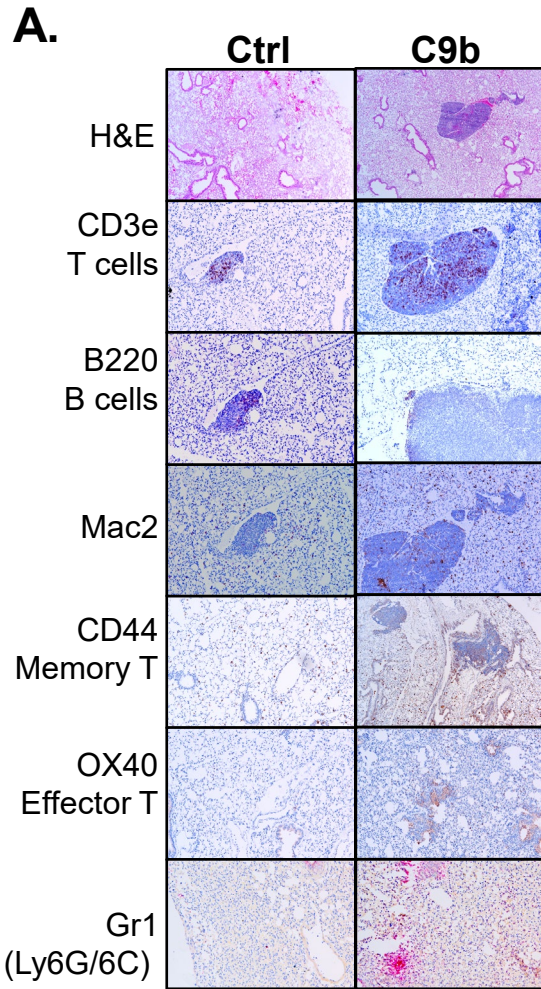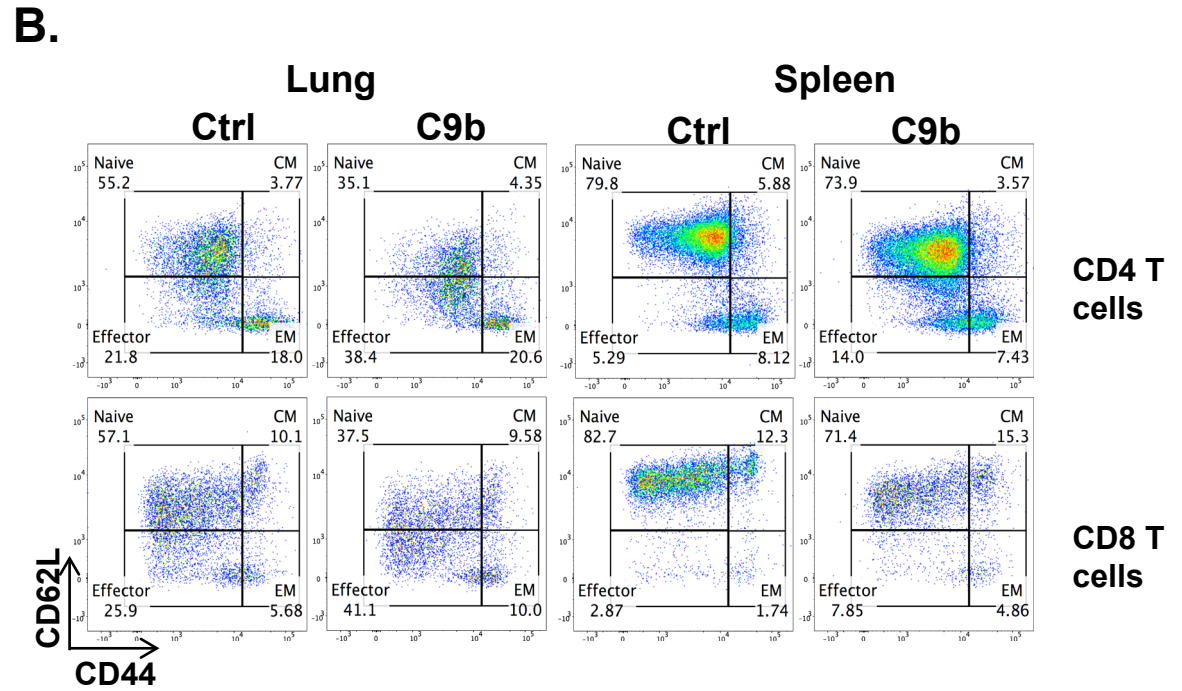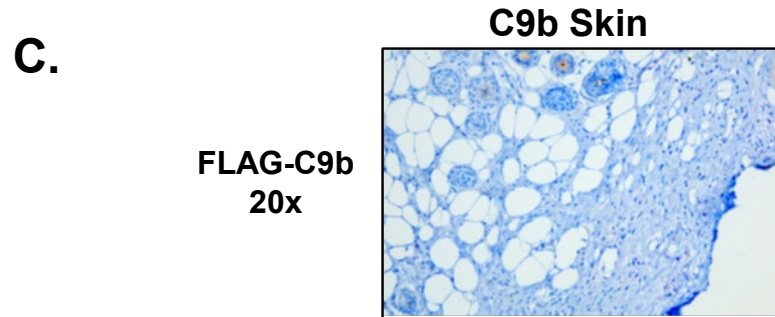

Suppl Fig. S4

**Supplementary Fig. S4. A.** H&E (5X) and immunohistochemical staining with indicated antibodies (10X) to detect each immune cell type present in lungs of control vs. C9b mice. **B.** FACS analyses of lungs and spleens of control and C9b mice show increased effector/effector memory cells both in CD4+ and CD8+ T cell populations. **C.** Immunohistochemical staining with FLAG antibody to show FLAG-tagged C9b is not expressed in the skin of C9b mice (20x).

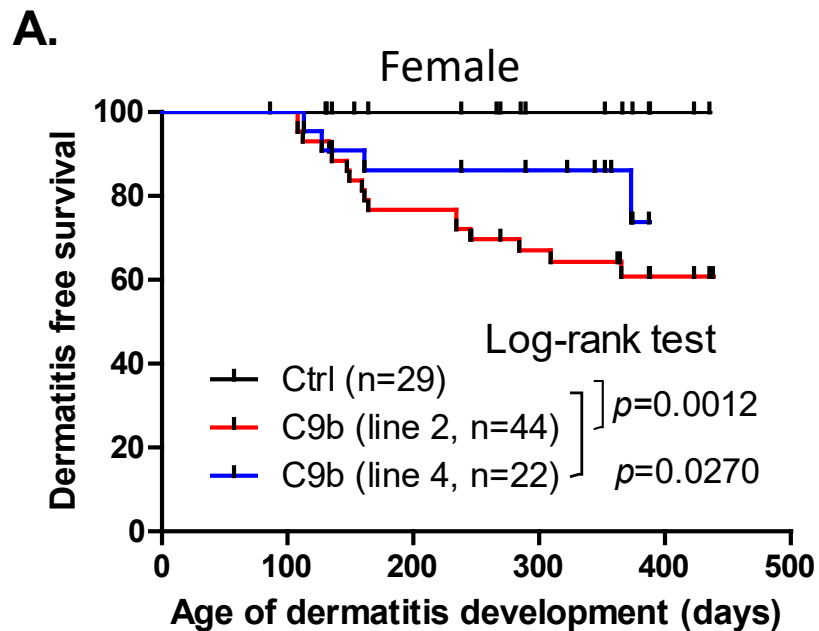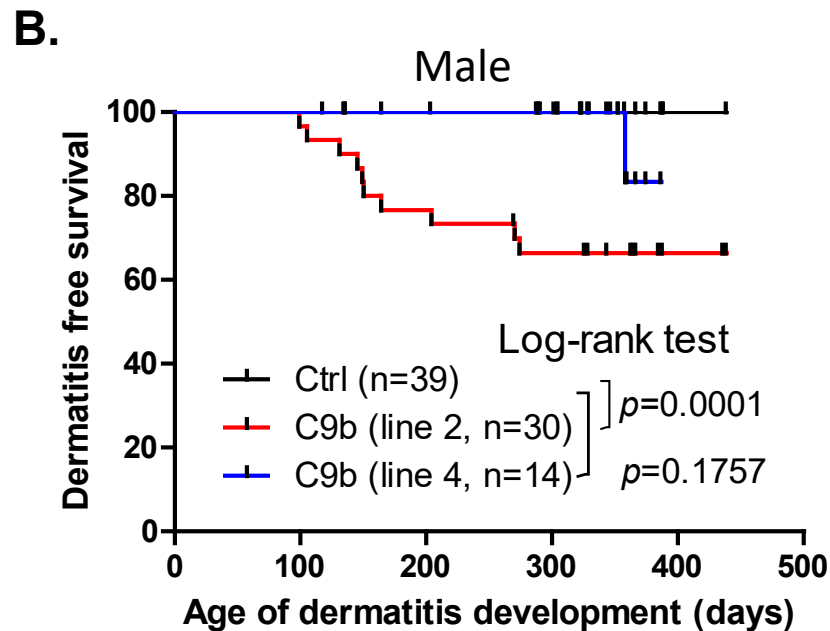

**C.**

|        | ALL            |            | Female          |            | Male            |            |
|--------|----------------|------------|-----------------|------------|-----------------|------------|
| Ctrl   | n=0/68 (0%)    |            | n=0/29 (0%)     |            | n=0/39 (0%)     |            |
| Line 2 | n=26/74 (35%)  | $p<0.0001$ | n=16/44 (36.4%) | $p=0.0012$ | n=10/30 (33.3%) | $p=0.0001$ |
| Line 4 | n=5/36 (13.9%) | $p=0.0029$ | n=4/22 (18.2%)  | $p=0.0270$ | n=1/14 (7%)     | $p=0.1757$ |

**Supplementary Fig. S5. A-B.** Kaplan-Meier dermatitis free survival curves for female (**A**) and male (**B**) mice for each group. **C.** A summary table of dermatitis-free survival for each group for female, male and all combined mice. *p* values (log-rank test) compared to the control group are shown.

**A.**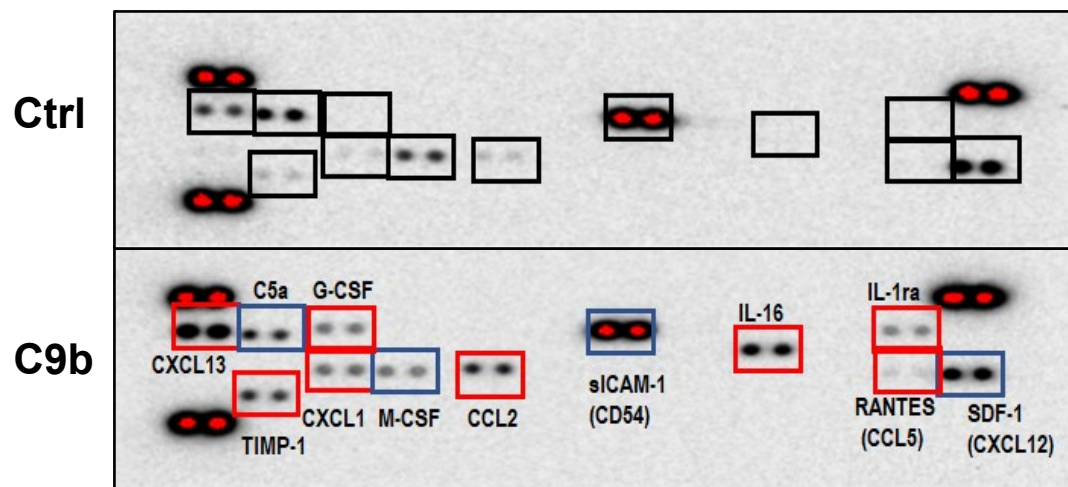**D.**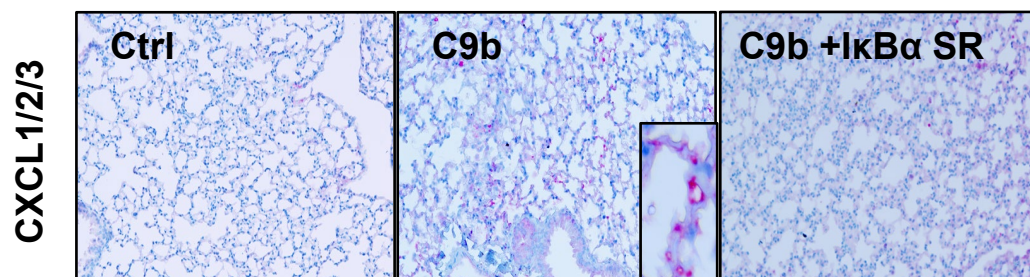**Suppl Fig. S6****B.**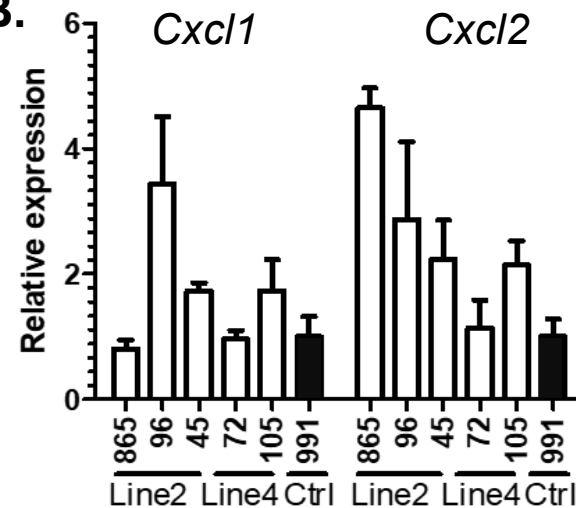**C.**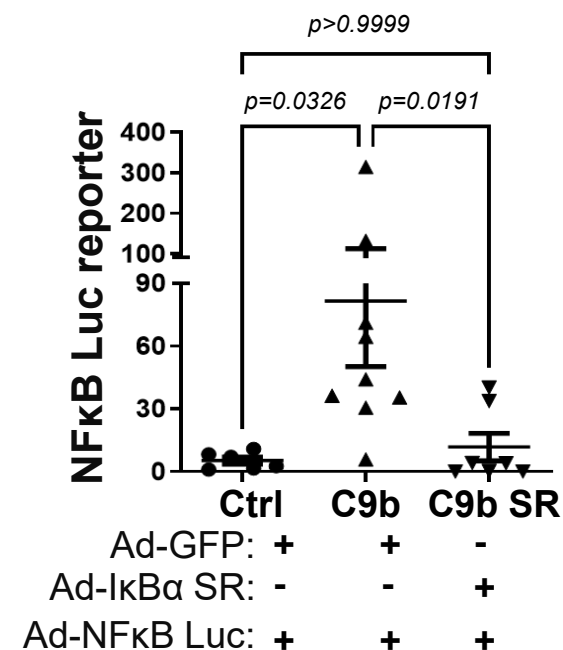

**E.**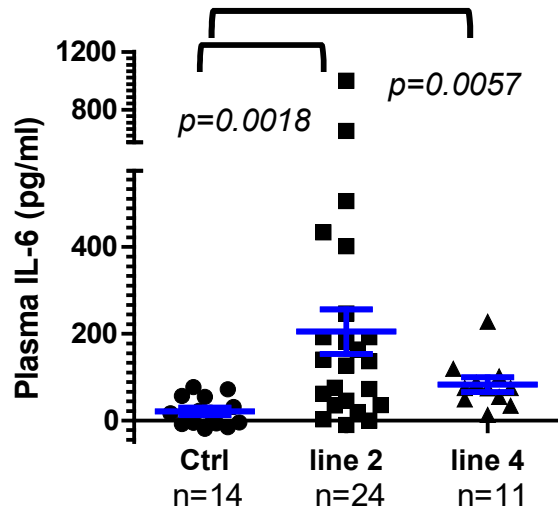**F.**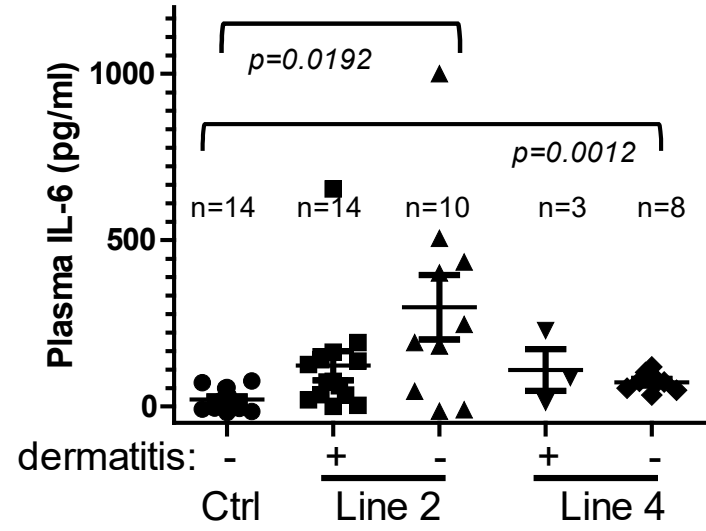



**Supplementary Fig. S6. A.** Scanned images of mouse cytokine arrays with plasma samples pooled from 4 mice in each group. Cytokines/chemokines with increased signal in C9b mice are marked with red box and ones with decreased signal in blue quantified by image J. **B.** Relative mRNA level of *Cxcl1* and *Cxcl2* in lungs of Line 2 and Line 4 C9b mice normalized against C9b negative control measured by real-time qRT-PCR (ddCt method). **C.** NF- $\kappa$ B promoter activity measured by luciferase activity (Promega) on day 7 following intratracheal injection of Ad-NF- $\kappa$ B reporter with Ad-GFP control or Ad-I $\kappa$ B $\alpha$  super repressor (SR) (Vector BioLabs, all  $2.5 \times 10^7$  PFU per mouse) into control or C9b mice. **D.** Immunohistochemical staining of CXCK1/2/3 (Gro $\alpha$ / $\beta$ / $\gamma$ , Santacruz biotechnology) of lungs of control (left) and C9b (middle) mice with control Ad-GFP and C9b (right) with Ad- I $\kappa$ B $\alpha$  SR. Inset in the middle panel shows staining in the lung epithelial cells. **E-F.** Plasma levels of IL-6 (pg/ml) were measured by ELISA in Control, Line 2, and Line 4 mice. Data are means  $\pm$  SEM from 2 independent experiments.

**A.**

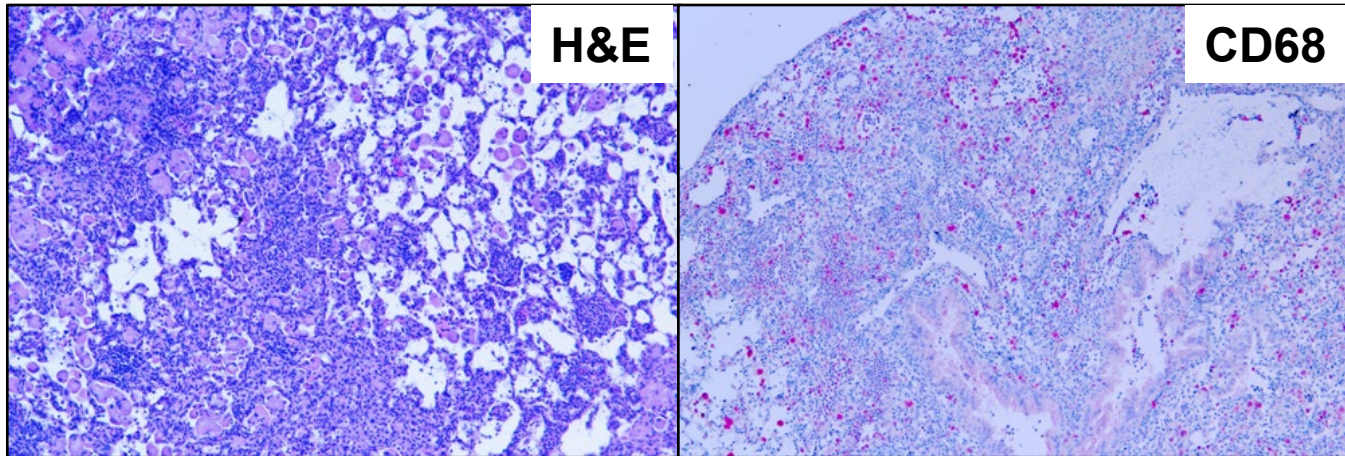

**B.**

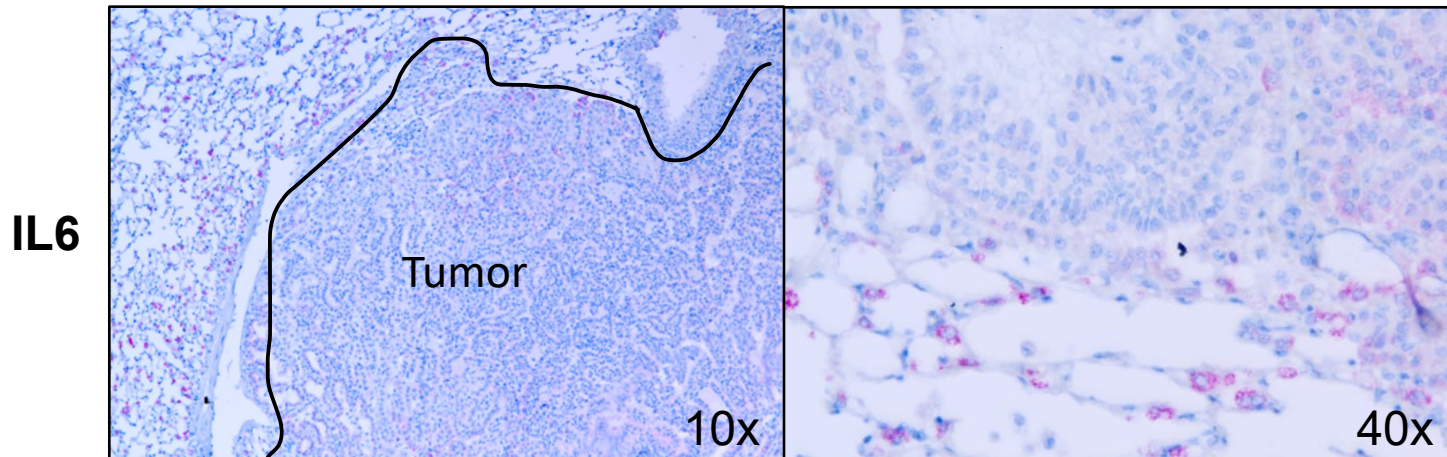

**Suppl Fig. S7**

**Supplementary Fig. S7. A.** Lungs of C9b mice show features similar to those observed in smoking-related lung diseases with severe inflammation associated with increased intra-alveolar infiltration of macrophages (CD68+) and lymphocytes (n=2/20 in line 2 and n=1/13 in line 4 mice).

**B.** Immunohistochemical staining with anti-IL6 antibody showed strong IL6 signal in type II pneumocytes but not in tumor cells.



**Supplementary Fig. S8** FACS analyses of lungs and spleens of *KRAS*<sup>G12D L/+</sup> mice with intratracheal injection of lentiviral particles containing GFP-, WT-, or mutant C9b-Cre(T2a)Luc. CD11b<sup>+</sup> Gr1<sup>+</sup> MDSCs are increased in the lungs of these mice by WT C9b expression compared to GFP control or Mut C9b expression.

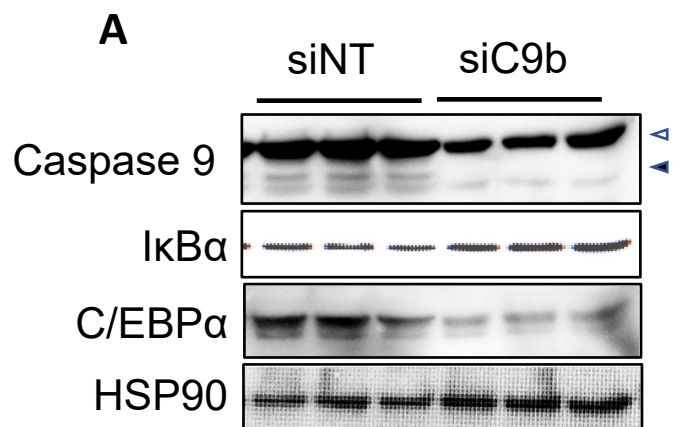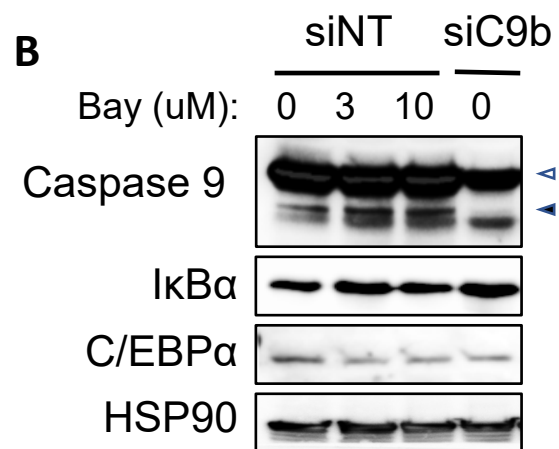

**Suppl Fig. S9**

**Supplementary Fig. S9.** Western blot analyses of A549 cells transfected with siNT or siC9b with indicated antibodies. **A.** Reduced Caspase 9b expression via siRNA (siC9b) reduced C/EBP $\alpha$  level in A549 cells compared to siNT (non-targeting) control. **B.** NF- $\kappa$ B/IKK inhibitor Bay 11-7082 treatment reduced C/EBP $\alpha$  level in A549 cells. The empty and filled triangles denote full-length C9a and C9b proteins, respectively

## SUPPLEMENTARY REFERENCES

1. Geiling B, Vandal G, Posner AR, de Bruyns A, Dutchak KL, Garnett S, *et al.* A modular lentiviral and retroviral construction system to rapidly generate vectors for gene expression and gene knockdown in vitro and in vivo. *PLoS One* **2013**;8:e76279
2. Vu NT, Park MA, Shultz MD, Bulut GB, Ladd AC, Chalfant CE. Caspase-9b Interacts Directly with cIAP1 to Drive Agonist-Independent Activation of NF-kappaB and Lung Tumorigenesis. *Cancer Res* **2016**;76:2977-89
3. Balkwill F, Mantovani A. Inflammation and cancer: back to Virchow? *Lancet* **2001**;357:539-45
4. Sung H, Kanchi KL, Wang X, Hill KS, Messina JL, Lee JH, *et al.* Inactivation of RASA1 promotes melanoma tumorigenesis via R-Ras activation. *Oncotarget* **2016**;7:23885-96
5. Vu NT, Park MA, Shultz JC, Goehre RW, Hoeflerlin LA, Shultz MD, *et al.* hnRNP U enhances caspase-9 splicing and is modulated by AKT-dependent phosphorylation of hnRNP L. *J Biol Chem* **2013**;288:8575-84



## Supplemental table 1. List of key reagents and resoruces

### Antibodies

| Target                | Vendor                              | Cat #      | RRID             | Usage      |
|-----------------------|-------------------------------------|------------|------------------|------------|
| Caspase 9             | Enzo Life Sciences                  | AAM-149E   | RRID:AB_311717   | WB         |
| Caspase 9             | Cell Signaling Technology           | 9508       | RRID:AB_2068620  | IHC        |
| CXCL1/2/3             | Santa Cruz Biotechnology            | sc-365870  | RRID:AB_10859555 | IHC,<br>WB |
| FLAG                  | Sigma                               | F1804      | RRID:AB_262044   | WB,<br>IHC |
| Gr1 (Ly6G/6C)         | Novus Biological                    | NBP2-00441 | RRID:AB_2909793  | IHC        |
| HMGA2                 | Thermo Fisher Scientific            | PA5-21320  | RRID:AB_11155799 | IHC        |
| HSP90                 | Cell Signaling Technology           | 4877       | RRID:AB_2233307  | WB         |
| IL6                   | Thermo Fisher Scientific<br>(Bioss) | BS-0782R   | RRID:AB_10859871 | IHC        |
| I $\kappa$ B $\alpha$ | Cell Signaling Technology           | 4814       | RRID:AB_390781   | WB,<br>IHC |
| Myc-Tag               | Cell Signaling Technology           | 2276       | RRID:AB_331783   | WB,<br>IHC |
| p63                   | Santa Cruz Biotechnology            | sc-25268   | RRID:AB_628092   | IHC        |
| pERK                  | Cell Signaling Technology           | 4370       | RRID:AB_2315112  | WB,<br>IHC |
| RIP1                  | Cell Signaling Technology           | 3493       | RRID:AB_2305314  | WB, IP     |
| SOX2                  | Sigma (Millipore)                   | AB5603     | RRID:AB_2286686  | IHC        |
| SP-C                  | Santa Cruz Biotechnology            | sc-13979   | RRID:AB_2185502  | IHC        |
| Synaptophysin         | Santa Cruz Biotechnology            | sc-55507   | RRID:AB_630273   | IHC        |
| $\beta$ -actin        | Cell Signaling Technology           | 3700       | RRID:AB_2242334  | WB         |

### Cell lines

| Name     | Vendor | Cat #    | RRID           |
|----------|--------|----------|----------------|
| HBEC3-KT | ATCC   | CRL-4051 | RRID:CVCL_X491 |
| MLE12    | ATCC   | CRL-2110 | RRID:CVCL_3751 |
| A549     | ATCC   | CCL-185  | RRID:CVCL_0023 |
| 293T     | ATCC   | CRL-3216 | RRID:CVCL_0063 |

### Tools

| Name           | RRID            |
|----------------|-----------------|
| Image J        | RRID:SCR_003070 |
| FlowJo         | RRID:SCR_008520 |
| GraphPad Prism | RRID:SCR_002798 |

### Experimental Models: Organisms/Strains

| Name               | RRID                 |
|--------------------|----------------------|
| KRAS G12D L/+ mice | RRID:IMSR_JAX:008179 |

**Plasmids**

| <b>Name</b>                    | <b>RRID</b>        |
|--------------------------------|--------------------|
| pLEX304                        | RRID:Addgene_25890 |
| pBEG R2-iCre T2A Luciferase-L3 | RRID:Addgene_48992 |
| pLEG R1-R3                     | RRID:Addgene_48956 |
| psPAX2                         | RRID:Addgene_12260 |
| pMD2.G                         | RRID:Addgene_12259 |

## Abbreviations

WB: western blot, IHC: immunohistochemistry, IP: immunoprecipitation

ATCC: American Type Culture Collection
